# Supplementary material for: Preparation and evaluation of Fe3O4@C@NiCo-LDH@CDs composites for magnetic solid-phase extraction of trace endocrine disruptors
Source: Royal Society of Chemistry journal article supplement (doi:10.1039/d4ay00864b), 2024-01-01
Supplement: d4ay00864b1.pdf [file d4ay00864b1.pdf]

## Supplementary material

### Preparation and evaluation of $\text{Fe}_3\text{O}_4@\text{C}@\text{NiCo-LDH}@\text{CDs}$ composites for magnetic solid-phase extraction of trace endocrine disruptors

Honglin Qin<sup>1,#</sup>, Ruozhu Xu<sup>1,#</sup>, Lizhen Qiao<sup>1,2,\*</sup>, Xupeng Zhai<sup>2</sup>, Peixin Guo<sup>2</sup>, Chen Li<sup>2</sup>,  
Bingyan Han<sup>1,\*</sup>

1 School of Chemical Engineering, University of Technology, Panjin 124221, China

2 Huajin Aramco Petrochemical Company Limited, Panjin 124211, China

\* Correspondence:

Dr. Lizhen Qiao, e-mail: lzqiao3@163.com

Dr. Bingyan Han, e-mail: byhan@dlut.edu.cn

#### Content:

- Figure S1.** The schematic diagram for magnetic solid-phase extraction of EDPs using  $\text{Fe}_3\text{O}_4@\text{C}@\text{NiCo-LDH}@\text{CDs}$  adsorbents.
- Figure S2.** Effect of glucose content on the MSPE efficiency.
- Figure S3.** Effect of LDH type on the MSPE efficiency.
- Figure S4.** Effect of CDs type (a) and volume of CDs solution (b) on the MSPE efficiency.
- Figure S5.** Zeta potential of  $\text{Fe}_3\text{O}_4@\text{C}@\text{NiCo-LDH}@\text{CDs}$ .
- Figure S6.** The reproducibility (a) and reusability (b) of the  $\text{Fe}_3\text{O}_4@\text{C}@\text{NiCo-LDH}@\text{CDs}$  adsorbents.
- Table S1.** The standard deviation corresponding to the slope and intercept.

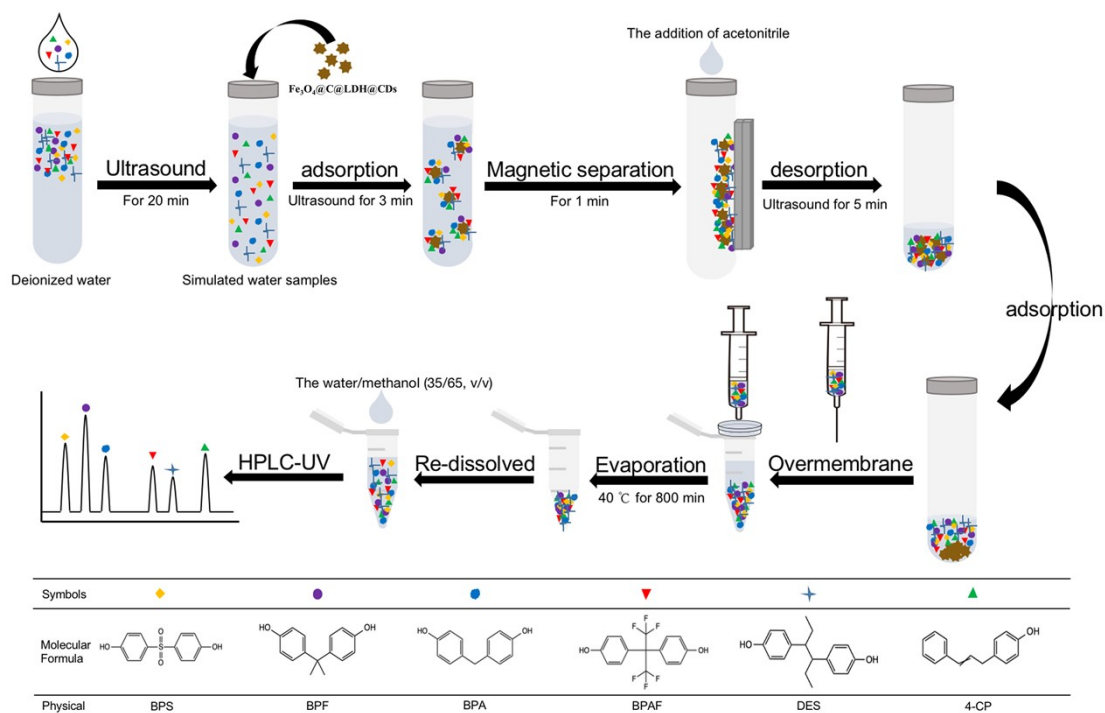

**Figure S1.** The schematic diagram for magnetic solid-phase extraction of EDPs using  $\text{Fe}_3\text{O}_4@\text{C}@\text{NiCo-LDH}@\text{CDs}$  adsorbents.

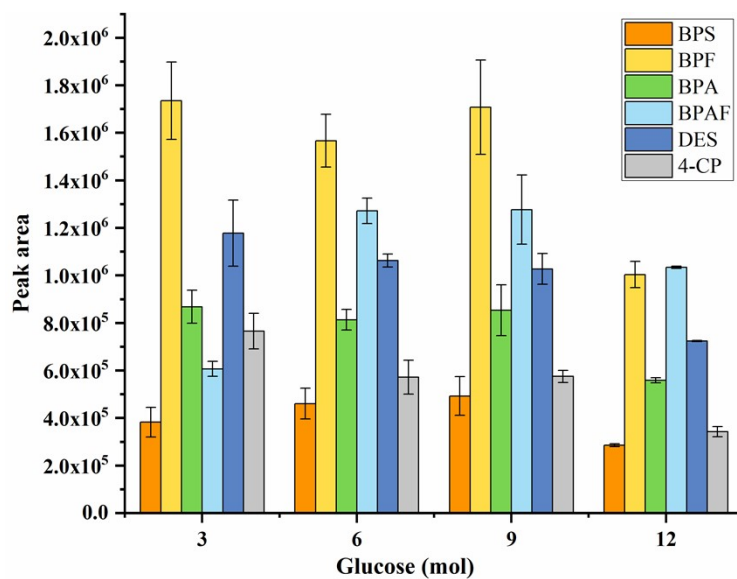

**Figure S2.** Effect of glucose content on the MSPE efficiency.

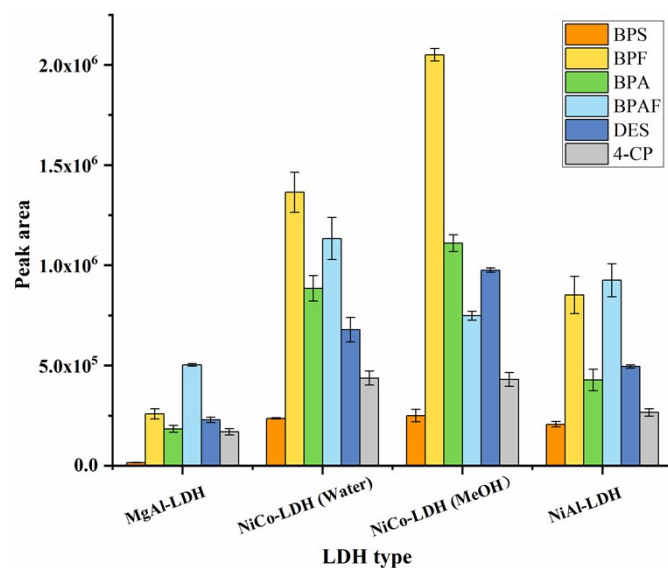

Figure S3. Effect of LDH type on the MSPE efficiency.

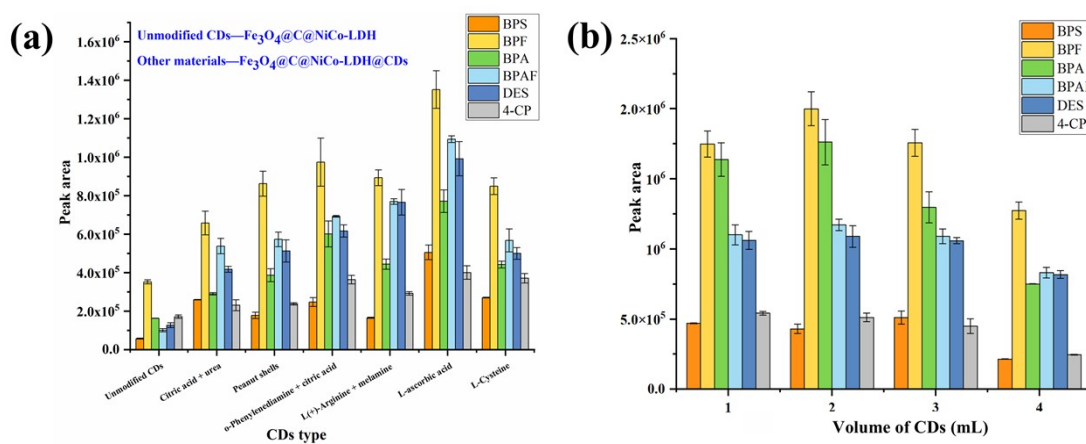

Figure S4. Effect of CDs type (a) and volume of CDs solution (b) on the MSPE efficiency.

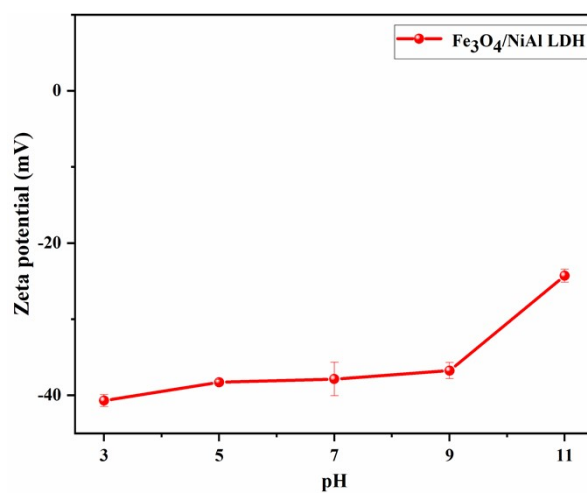

Figure S5. Zeta potential of Fe<sub>3</sub>O<sub>4</sub>@C@NiCo-LDH@CDs.

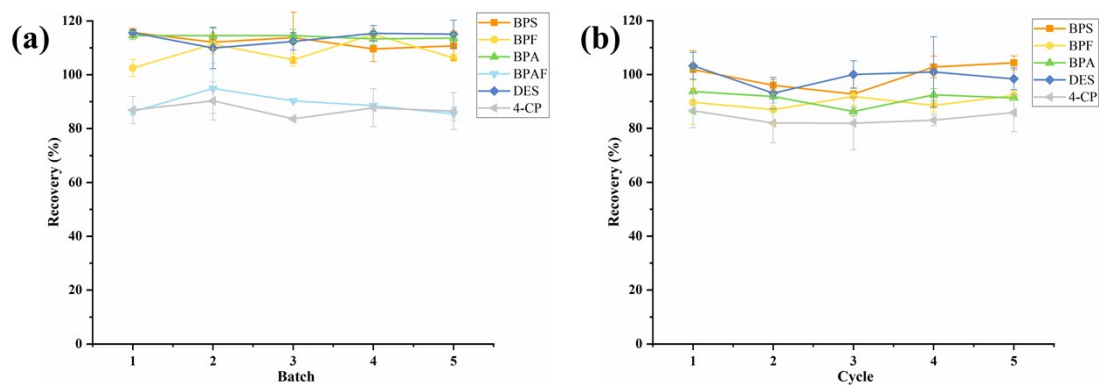

**Figure S6.** The reproducibility (a) and reusability (b) of the  $\text{Fe}_3\text{O}_4@\text{C}@\text{NiCo-LDH}@\text{CDs}$  adsorbents.

**Table S1.** The standard deviation corresponding to the slope and intercept.

| Analytes | Regression equation | Slope |                    | Intercept |                    |
|----------|---------------------|-------|--------------------|-----------|--------------------|
|          |                     | Value | Standard deviation | Value     | Standard deviation |
| BPS      | $Y=18.97X+54.87$    | 18.97 | 0.26               | 54.87     | 21.64              |
| BPF      | $Y=36.15X+129.03$   | 36.15 | 0.36               | 129.03    | 26.49              |
| BPAF     | $Y=22.28X+69.53$    | 22.28 | 0.22               | 69.53     | 15.92              |
| 4-CP     | $Y=20.01X-7.13$     | 20.01 | 0.18               | -7.13     | 13.54              |
| BPA      | $Y=24.43X+33.88$    | 24.43 | 0.42               | 33.88     | 30.75              |
| DES      | $Y=8.28X+124.41$    | 8.28  | 0.31               | 124.41    | 22.51              |
